# Supplementary material
Source: publisher figshare collection journal article supplement (https://acs.figshare.com/ndownloader/files/4105588)
Supplement: Supplementary file 1 [file 4105588]

**Table S1.** Protein identification of rFgGST-S1 using MASCOT. Spectra from mass spectrometry were subjected to MSMS ion searches using MASCOT (Matrix Science). Significant hits, at P = 5%, have a MASCOT score of 52 or greater. All reported accession numbers are from GenBank.

**Figure S1.** MSMS sequence analysis using peptide sequencer (MassLynx v. 5.0, Micromass, UK) from the fragmentation of a precursor ion m/z 534.75 (2+) representative of the Sigma class GST. Interpretation of the y and b ion series provided the peptide sequence YQESMAIAR.

**Figure S2.** MSMS sequence analysis using peptide sequencer (MassLynx v. 5.0, Micromass, UK) from the fragmentation of a precursor ion m/z 889.99 (2+) representative of the Sigma class GST. Interpretation of the y and b ion series provided the peptide sequence TDEEYYLIER.

**Figure S3.** Representative 2DE protein arrays of *F. gigantea* GSTs purified from somatic extracts highlighting the non-specific binding of proteins using S-hexyl-GSH agarose. 15 µg of S-hexyl-GSH agarose binding proteins were profiled on a 12.5 % polyacrylamide gel via two-dimensional electrophoresis (2DE) and stained with coomassie blue. Proteins were isoelectric focused on 17 cm pH 3-10 non-linear immobilised pH gradient (IPG) strips. Boxed is the region of the gel shown in Figure 2.

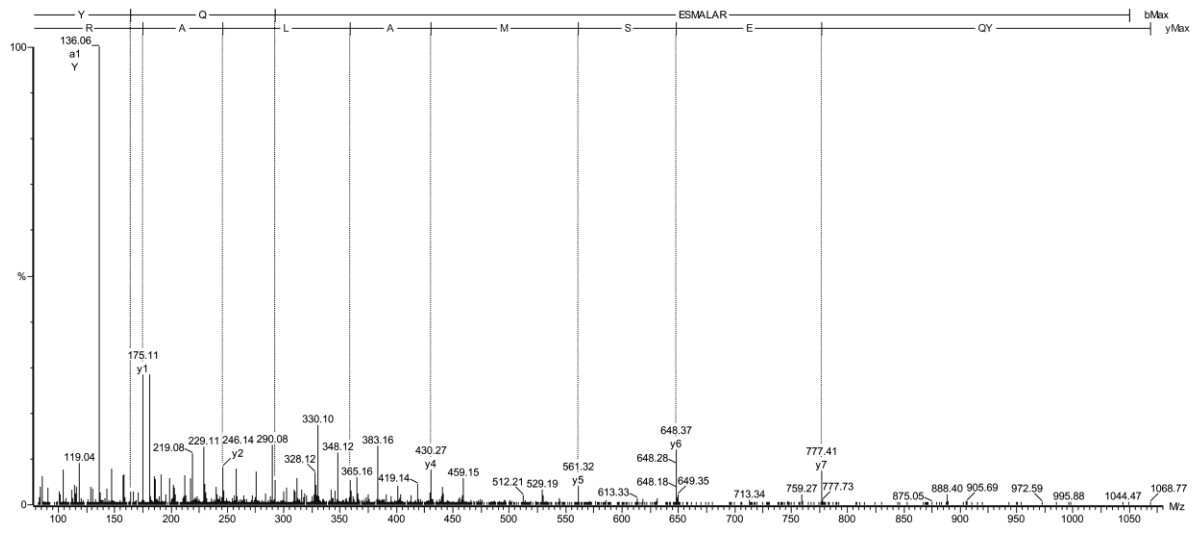

Figure S1

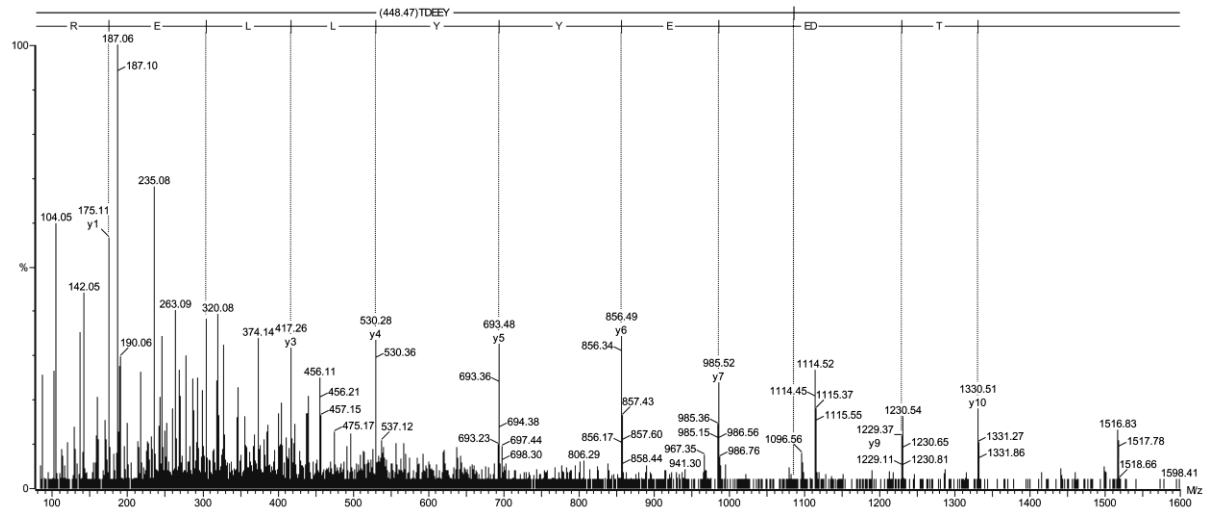

Figure S2

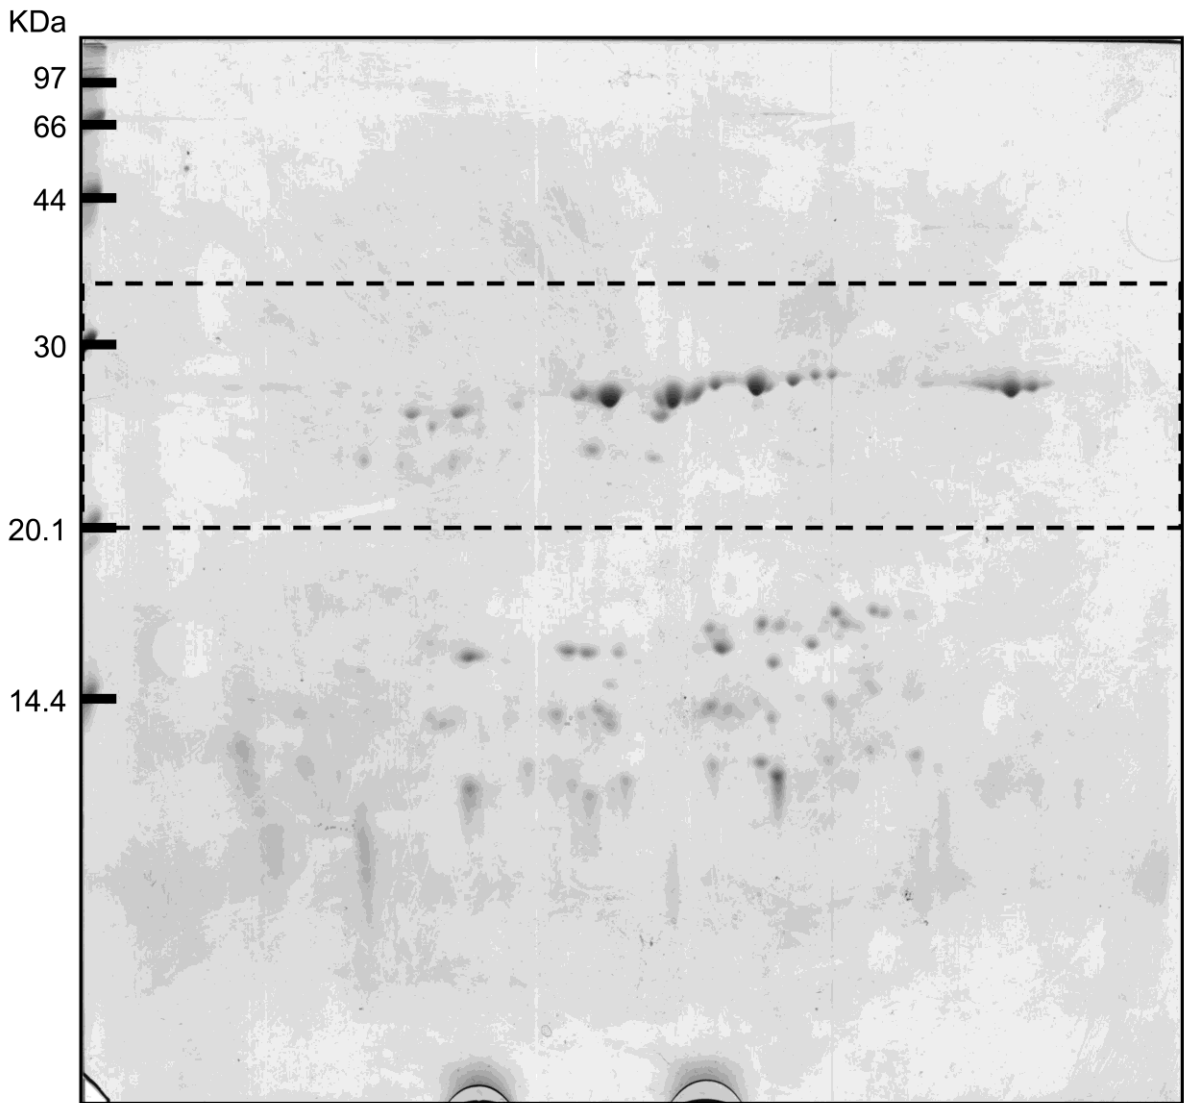

Figure S3

Table S1

| Spot Number | NCBI Accession Number | MASCOT Score | Protein         | Organism          | % Coverage | Unique Peptides | Peptides Hit                                                                                     |
|-------------|-----------------------|--------------|-----------------|-------------------|------------|-----------------|--------------------------------------------------------------------------------------------------|
| 1           | 2WB9_A                | 120          | Sigma Class GST | Fasciola hepatica | 17         | 3               | VPLLDVTGPDGK<br>MMGETDEEYLIER<br>IIGECEDLYR                                                      |
| 2           | 2WB9_A                | 179          | Sigma Class GST | Fasciola hepatica | 18         | 3               | VPLLDVTGPDGK<br>MMGETDEEYLIER<br>LVSESLESSGGK                                                    |
| 3           | 2WB9_A                | 241          | Sigma Class GST | Fasciola hepatica | 21         | 4               | VPLLDVTGPDGK<br>YQESMAIAR<br>MMGETDEEYLIER<br>IIGECEDLYR                                         |
| 4           | 2WB9_A                | 158          | Sigma Class GST | Fasciola hepatica | 17         | 3               | LVSESLESSGGK<br>IIGECEDLYR<br>MMGETDEEYLIER                                                      |
| 5           | 2WB9_A                | 167          | Sigma Class GST | Fasciola hepatica | 17         | 3               | MMGETDEEYLIER<br>IIGECEDLYR<br>LVSESLESSGGK                                                      |
| 6           | 2WB9_A                | 339          | Sigma Class GST | Fasciola hepatica | 34         | 7               | LWYFQFR<br>VPLLDVTGPDGK<br>YQESMAIAR<br>MMGETDEEYLIER<br>IIGECEDLYR<br>ENNGPTLLK<br>LVSESLESSGGK |
| 7           | 2WB9_A                | 313          | Sigma Class GST | Fasciola hepatica | 27         | 5               | YQESMAIAR<br>LVSESLESSGGK<br>VPLLDVTGPDGK<br>IIGECEDLYR<br>MMGETDEEYLIER                         |
